# Supplementary material for: Efficient knock-in method enabling lineage tracing in zebrafish
Source: Life Sci Alliance. 2023 Mar 6;6(5):e202301944. doi: 10.26508/lsa.202301944 (PMC9990459; doi:10.26508/lsa.202301944)
Supplement: Supplementary file 1 [file LSA-2023-01944_TableS1.xlsx]

## Sheet: Figure 1C
donor (krt92)	number	Type	Positive Percentage
circular plasmid	0	positive	0/195
circular plasmid	195	negative
dsDNA	0	positive	0/250
dsDNA	250	negative
5' modified dsDNA	8	positive	8/150
5' modified dsDNA	150	negative
Note: the criteria for positive is based on the estimation of the percentage of fluorescence on the skin

## Sheet: Figure 1D
Fish	number	Type	Positive Percentage
F0	4	positive	4/8
F0	4	negative

## Sheet: Figure 1E
Fish	number	Type	Positive Percentage
Fish 1	20	positive	20/80
Fish 1	80	negative
Fish 2	38	positive	38/238
Fish 2	200	negative
Fish 3	15	positive	15/130
Fish 3	115	negative
Fish 4	10	positive	10/80
Fish 4	70	negative

## Sheet: Figure 2B
transgene	number	Type	Positive Percentage
5' modi dsDNA krt4-p2A-mNeonGreen	16	positive	16/216
5' modi dsDNA krt4-p2A-mNeonGreen	200	negative
5' modi dsDNA krt4-p2A-mNeonGreen-t2A-iCre	12	positive	12/282
5' modi dsDNA krt4-p2A-mNeonGreen-t2A-iCre	270	negative
5' modi dsDNA krt4-p2A-EGFP-t2A-CreERT2	8	positive	8/409
5' modi dsDNA krt4-p2A-EGFP-t2A-CreERT2	401	negative
krt4-p2A-EGFP-t2A-CreERT2 dsDNA	1	positive	1/299
krt4-p2A-EGFP-t2A-CreERT2 dsDNA	298	negative
Note: the criteria for positive is based on the estimation of the percentage of fluorescence on the skin

## Sheet: Figure 2C
transgene	number	Type	Positive Percentage
5' modi dsDNA krt4-p2A-mNeonGreen	6	positive	6/7
5' modi dsDNA krt4-p2A-mNeonGreen	1	negative
5' modi dsDNA krt4-p2A-mNeonGreen-t2A-iCre	5	positive	5/6
5' modi dsDNA krt4-p2A-mNeonGreen-t2A-iCre	1	negative
5' modi dsDNA krt4-p2A-EGFP-t2A-CreERT2	4	positive	4/5
5' modi dsDNA krt4-p2A-EGFP-t2A-CreERT2	1	negative

## Sheet: Figure 2D
transgene	positve	negative	Positive Percentage
5' modi dsDNA krt4-p2A-mNeonGreen 1	34	129	34/163
5' modi dsDNA krt4-p2A-mNeonGreen 2	11	90	11/101
5' modi dsDNA krt4-p2A-mNeonGreen 3	4	45	4/49
5' modi dsDNA krt4-p2A-mNeonGreen 4	23	82	23/105
5' modi dsDNA krt4-p2A-mNeonGreen 5	16	48	16/64
5' modi dsDNA krt4-p2A-mNeonGreen-t2A-iCre 1	32	186	32/218
5' modi dsDNA krt4-p2A-mNeonGreen-t2A-iCre 2	6	36	6/42
5' modi dsDNA krt4-p2A-mNeonGreen-t2A-iCre 3	14	110	14/124
5' modi dsDNA krt4-p2A-mNeonGreen-t2A-iCre 4	8	99	8/107
5' modi dsDNA krt4-p2A-mNeonGreen-t2A-iCre 5	5	400	5/405
5' modi dsDNA krt4-p2A-EGFP-t2A-CreERT2 1	23	88	23/111
5' modi dsDNA krt4-p2A-EGFP-t2A-CreERT2 2	12	300	12/312

## Sheet: Figure 3B
transgene	number	Type	Positive Percentage
5' modi dsDNA short HA nkx6.1-p2A-mNeonGreen	4	positive	4/229
5' modi dsDNA short HA nkx6.1-p2A-mNeonGreen	225	negative
5' modi dsDNA short HA nkx6.1-p2A-mNeonGreen-t2A-iCre	5	positive	5/355
5' modi dsDNA short HA nkx6.1-p2A-mNeonGreen-t2A-iCre	350	negative
5' modi dsDNA long HA nkx6.1-p2A-EGFP-t2A-CreERT2	2	positive	2/1000
5' modi dsDNA long HA nkx6.1-p2A-EGFP-t2A-CreERT2	1000	negative
5' modi dsDNA short HA nkx6.1-p2A-EGFP-t2A-CreERT2	5	positive	5/155
5' modi dsDNA short HA nkx6.1-p2A-EGFP-t2A-CreERT2	150	negative
Note: the criteria for positive is visible green fluorescence in the central nervous system

## Sheet: Figure 3C
transgene	number	Type	Positive Percentage
5' modi dsDNA short HA nkx6.1-p2A-mNeonGreen	3	positive	3/4
5' modi dsDNA short HA nkx6.1-p2A-mNeonGreen	1	negative
5' modi dsDNA short HA nkx6.1-p2A-mNeonGreen-t2A-iCre	4	positive	4/5
5' modi dsDNA short HA nkx6.1-p2A-mNeonGreen-t2A-iCre	1	negative
5' modi dsDNA long HA nkx6.1-p2A-EGFP-t2A-CreERT2	2	positive	2/2
5' modi dsDNA long HA nkx6.1-p2A-EGFP-t2A-CreERT2	0	negative

## Sheet: Figure 3D
transgene	positve	negative	Positive Percentage
5' modi dsDNA short HA nkx6.1-p2A-mNeonGreen	11	60	11/71
5' modi dsDNA short HA nkx6.1-p2A-mNeonGreen	4	34	4/38
5' modi dsDNA short HA nkx6.1-p2A-mNeonGreen	8	168	8/176
5' modi dsDNA short HA nkx6.1-p2A-mNeonGreen-t2A-iCre	7	86	7/93
5' modi dsDNA short HA nkx6.1-p2A-mNeonGreen-t2A-iCre	3	45	3/48
5' modi dsDNA short HA nkx6.1-p2A-mNeonGreen-t2A-iCre	9	132	9/141
5' modi dsDNA short HA nkx6.1-p2A-mNeonGreen-t2A-iCre	15	333	15/348
5' modi dsDNA long HA nkx6.1-p2A-EGFP-t2A-CreERT2	12	450	12/462
5' modi dsDNA long HA nkx6.1-p2A-EGFP-t2A-CreERT2	20	220	20/240

## Sheet: Figure 4D
treatment	fish id	number of lineage traced cells
6-somite to 36 hpf	fish 1	52
6-somite to 36 hpf	fish 2	45
6-somite to 36 hpf	fish 3	36
6-somite to 36 hpf	fish 4	43
6-somite to 36 hpf	fish 5	38
8-somite to 36 hpf	fish 6	5
8-somite to 36 hpf	fish 7	1
8-somite to 36 hpf	fish 8	8
8-somite to 36 hpf	fish 9	6
8-somite to 36 hpf	fish 10	6

[truncated: 8 more sheets: figure 4 supp 1M, figure 4 supp 1N, figure 4 supp 1O, Figure 4 supp 2D, Figure 5B, Figure 5C, Figure 5D, Figure 5 supp 1J]
